# Supplementary material
Source: Springer Nature journal article supplement (https://www.springermedizin.de/resource/supplementary/12936_2011_1918_MOESM14_ESM.pdf/9541982)
Supplement: MOESM14 [file 9541982]

# Studies of vivax malaria treatment *with 8-aminoquinolines*

Relapse (%)

Studies which enrolled : 5 - 13,720 patients

**N=56,060**

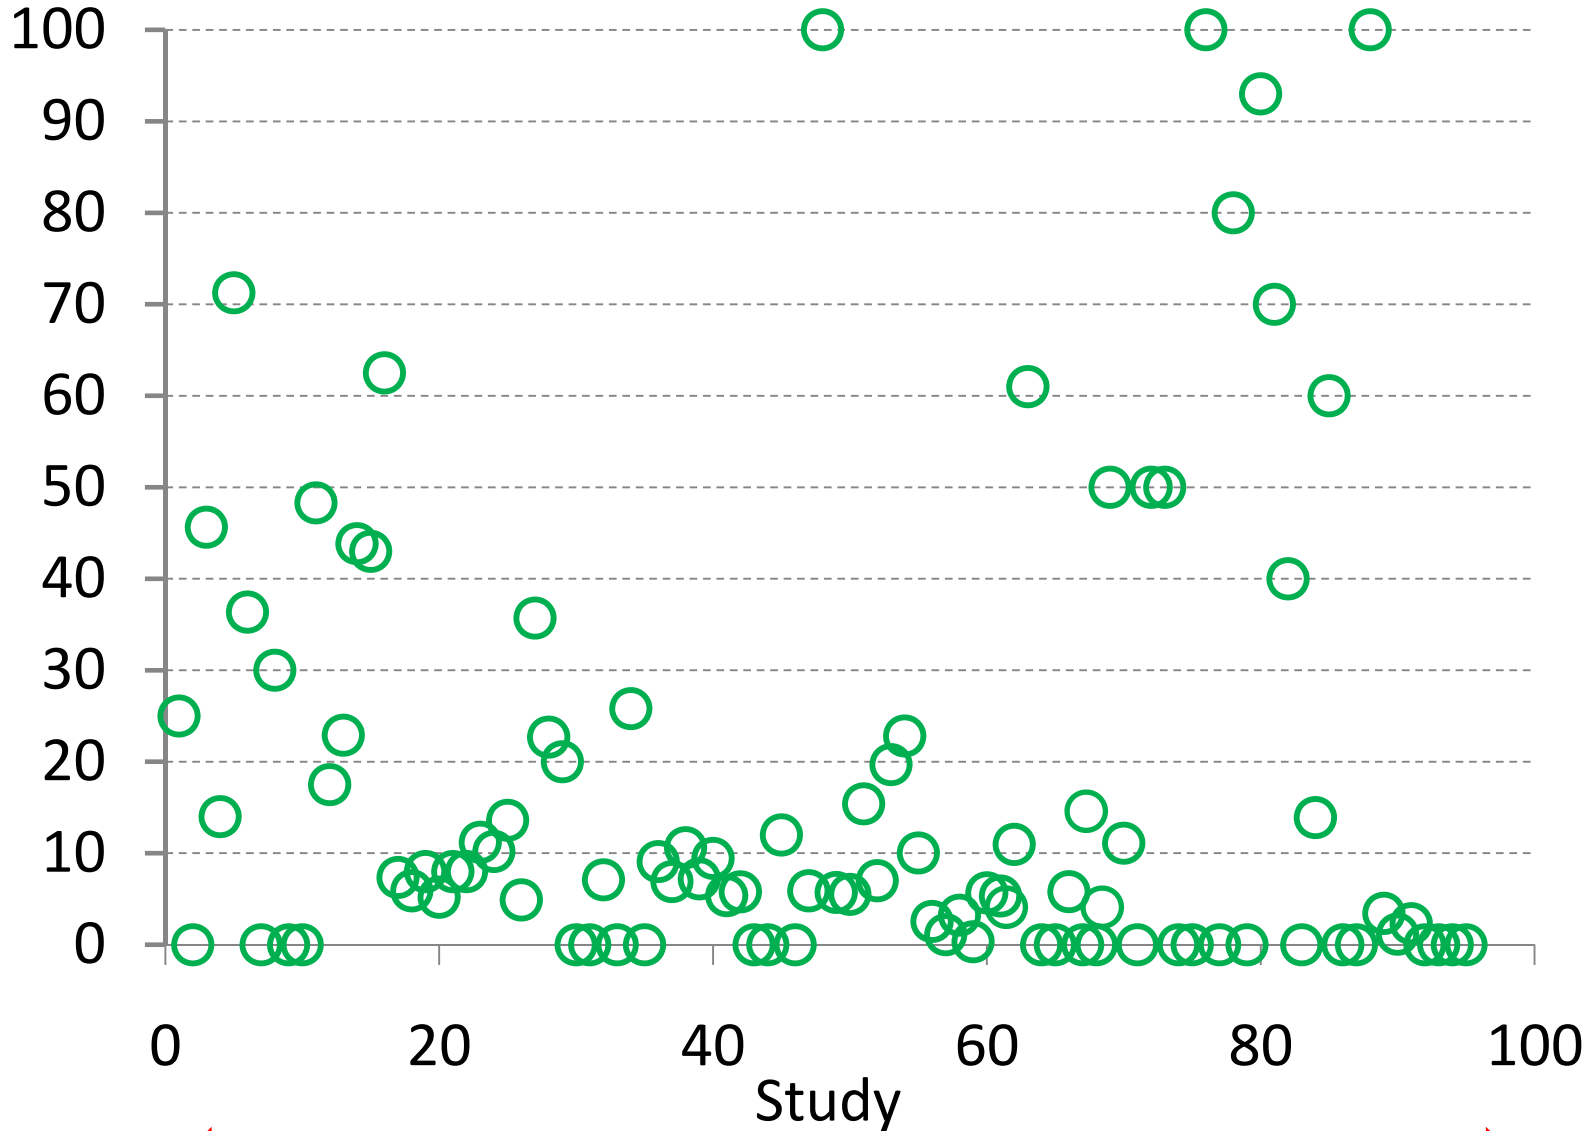

**West**

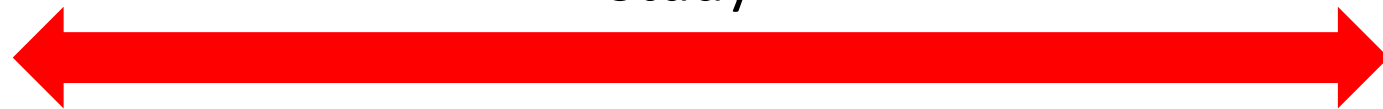

**East**
